# Supplementary material for: Network-Based Isoform Quantification with RNA-Seq Data for Cancer Transcriptome Analysis
Source: PubMed Central journal article supplement (PMC4689380; doi:10.1371/journal.pcbi.1004465), 2015-12-23

**A**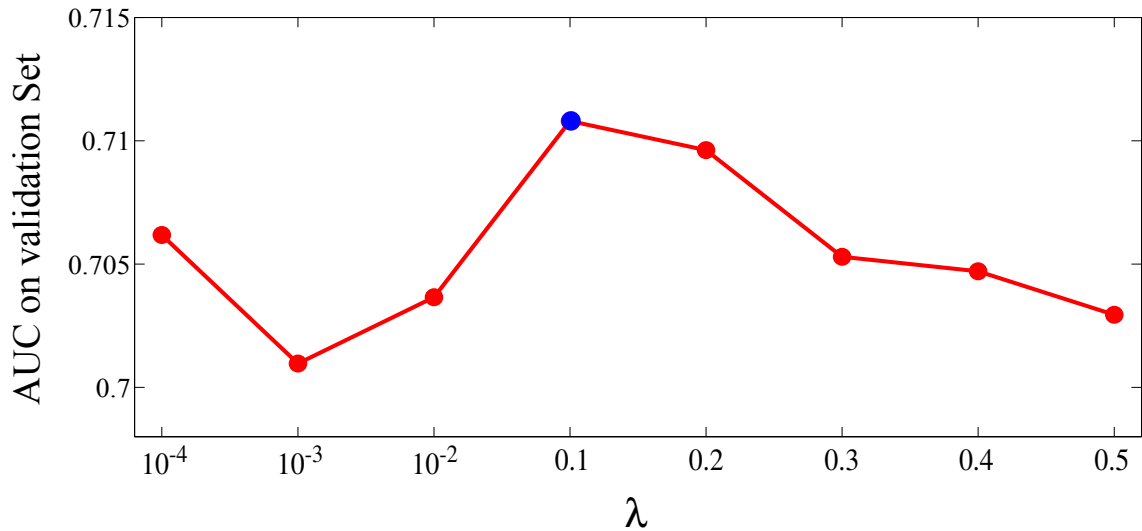**B**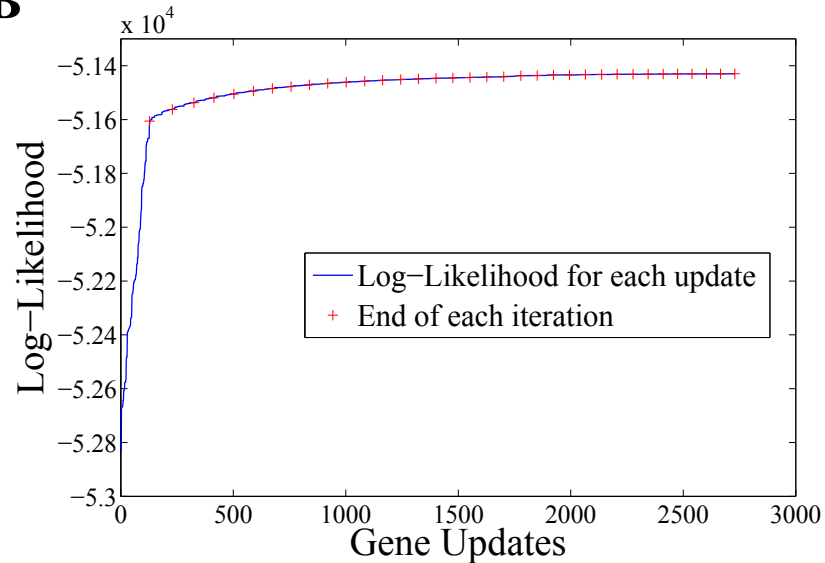

Supplement: pcbi.1004465.s006.pdf [file pcbi.1004465.s006.pdf]
