# Supplementary material for: Network-Based Isoform Quantification with RNA-Seq Data for Cancer Transcriptome Analysis
Source: PubMed Central journal article supplement (PMC4689380; doi:10.1371/journal.pcbi.1004465), 2015-12-23
Supplement: pcbi.1004465.s008.pdf [file pcbi.1004465.s008.pdf]

| Gene/Transcript(isoform) Names                                    | Primer Names*                                      | Forward                                                                                                        | Reverse                                                                                                             |
|-------------------------------------------------------------------|----------------------------------------------------|----------------------------------------------------------------------------------------------------------------|---------------------------------------------------------------------------------------------------------------------|
| ABL1<br>NM_007313(iso2)<br>NM_005157(iso1)                        | Template 1&2<br>qPCR 1&2<br>qPCR 2                 | 5-GGTTGGTGACTCCACAGGAAA<br>5-TGAAAAGCTCCGGGTCTTAGG<br>5-TAGCCAAAGACCATCAGCGTT                                  | 5-CACCGTCAGGCTGATTTCTTCC<br>5-TGACTGGCGTGATGTAGTTG<br>5-TTCGGGTTATCAATTCATGT                                        |
| CBCL<br>NM_012116(iso1)<br>NM_001130852(iso2)                     | Template 1&2<br>qPCR 1&2<br>qPCR 1                 | 5-ACCCTGTGGAACCAGGCTGC<br>5-ACCACCATTGACCTCACCTGC<br>5-CATCCTGCAGACCATCCCTG                                    | 5-CACCTGCCCCAGCTCCAACF<br>5-ACTGCCAGGAGCTGCCAGTT<br>5-GGCCGAGCTCAGTCAGGTCT                                          |
| KDM5C<br>NM_004187(iso1)<br>NM_001146702(iso2)                    | Template 1&2<br>qPCR 1&2<br>qPCR 1                 | 5-GACCTGCTGGAGGTGACCCT<br>5-GCCTTAACCAGCATTCCCA<br>5-AGAGGCTGAGGAGGTCCAGG                                      | 5-AAGCTTCTTGAGATCACAGGGAG<br>5-TCTTGGAAATGGTGTATGGCC<br>5-CCAAGCCATTCTGGTTCTCC                                      |
| TCF3<br>NM_003200(iso1)<br>NM_001136139(iso2)                     | Template 1&2<br>qPCR 1&2<br>qPCR 1                 | 5-TGAATCCCAAAGCAGCCTG<br>5-TGAATCCCAAAGCAGCCTGT<br>5-GTATGCCTCCGTGGGACGA                                       | 5-TCTTGTAACTAATGTTTTATTTCTTA<br>5-GGTTGTGGGCTTCGCTCAG<br>5-GGAGCTCCTGGACCAGTGT                                      |
| WHSC1L1<br>NM_023034(iso1)<br>NM_017778(iso2)                     | Template 1<br>Template 2<br>qPCR 1<br>qPCR 2       | 5-CAGTTCCTCAGGCTACAGTGAAGA<br>5-CAGTTCCTCAGGCTACAGTGAAGA<br>5-GTCGGGGGCTTGATAAACAGT<br>5-CCCTTCAGCTACTGCAGATGC | 5-CATACAACAAACAGACATCTAGATCAAC<br>5-GTAATGTAGTTCTTGCCAGCTTTACA<br>5-GTACCCATCCAGCTCAAACCG<br>5-CCAGGCACTCCAGGTGAAGT |
| KRAS<br>NM_033360(iso2)<br>NM_004985(iso1)                        | Template 1<br>Template 2<br>qPCR 1<br>qPCR 2       | 5-TTCCTGTCCATGCAGACTGT<br>5-TACATTGGTGAGGGAGATCCGA<br>5-TTCCTGTCCATGCAGACTGT<br>5-TACATTGGTGAGGGAGATCCGA       | 5-TAAGAAGTAATCAACTGCATGCACCA<br>5-TAAGAAGTAATCAACTGCATGCACCA<br>5-GCACCAAAAACCCCAAGACAG<br>5-TAGAAGGCATCATCAACACCCA |
| NMP1<br>NM_002520(iso1)<br>NM_0010337738(iso3)<br>NM_199185(iso2) | Template 1&2&3<br>qPCR 1&2&3<br>qPCR 1&3<br>qPCR 3 | 5-TCCTTTCCCTGGTGTGATTCC<br>5-TCCTTTCCCTGGTGTGATTCC<br>5-AGCTGAAGAAAAGCGCCAGT<br>5-AAGCCAAAGATGGGGAGAA          | 5-CATTGTGAGGTGAGGCAAATGC<br>5-TCGGCCTTTAGTTCAACAACCG<br>5-CTTTGTGCATTTTGGCTGG<br>5-AAGGGCAAGGTTCACTGAATCA           |

**S1 Table. Primer sets of the transcripts in seven genes of H9 stem cell line.** \* The numbers refer to the isoforms in the first column.
