# Supplementary material for: Network-Based Isoform Quantification with RNA-Seq Data for Cancer Transcriptome Analysis
Source: PubMed Central journal article supplement (PMC4689380; doi:10.1371/journal.pcbi.1004465), 2015-12-23
Supplement: pcbi.1004465.s009.pdf [file pcbi.1004465.s009.pdf]

| Gene Name | Transcript Name | Primer Sequence - Forward      | Primer Sequence - Reverse     |
|-----------|-----------------|--------------------------------|-------------------------------|
| HNRNPA2B1 | NM_031243       | TCC GCG ATG GAG GAA AAC TTT AG | GCC ACC AAT AAA GAG CTT ACG G |
|           | NM_002137       | AGC GGC AGT TCT CAC TAC AG     | TCC TTT TCT CTC CTC CAT CG    |
| HRAS*     | NM_176795       | CCG CTC TGG CTC TAG CTC        | ACC AAC GTG TAG AAG GCA TCC   |
|           | NM_005343       | AGG ATG CCT TCT ACA CGT TGG    | CAT GTC CTG AGC TTG TGC CT    |
| NSD-1     | NM_022455       | TCG CCA TTC TTG CCA TTA GC     | TTT TCA TTG CTG CCG TCC AC    |
|           | NM_172349       | ATT GTC TGC TGC CCT TTT CC     | TGG AAT CTG GAT CAT CCC GA    |
| TSC2*     | NM_000548       | CTC TCC ACC CGT GAA AGA ATT C  | GAC CAC ATG TTC AGA CAC ACT G |
|           | NM_001077183    | AAC GAG AGA CCC AAG AGG AT     | GA CGT ATC GAG CCA TCA TGT C  |
| WHSC1L1   | NM_023034       | ATG TAA AAC TGG GGC AGC AC     | AAG CAC CAA CAG AAC AAC GC    |
|           | NM_017778       | TTT CGG TTT GAG CTG GAT GG     | TTT GGG CTG TTT GGC AAA CC    |

**S2 Table. Primer sets of the transcripts in five genes of OVCAR8 cancer cell line. \* Gene contains more transcript(s) which can not be quantified by qRT-PCR.**
