# Supplementary material for: Network-Based Isoform Quantification with RNA-Seq Data for Cancer Transcriptome Analysis
Source: PubMed Central journal article supplement (PMC4689380; doi:10.1371/journal.pcbi.1004465), 2015-12-23
Supplement: pcbi.1004465.s010.pdf [file pcbi.1004465.s010.pdf]

| Gene Name | Transcript Name | Primer Sequence - Forward  | Primer Sequence - Reverse   |
|-----------|-----------------|----------------------------|-----------------------------|
| ERBB2     | NM_001005862    | 5-CACAGATAAAACGGGGGCAC     | 5-CAGGGTCTGAGTCTCTGTGCT     |
|           | NM_004448       | 5-GAGGGCTGCTTGAGGAAGTAT    | 5-TTCTCCGGTCCCAATGGAG       |
| NSD1      | NM_022455       | 5-GACACGGTGCAGTCAAATCG     | 5-GCTGCCGTCCACTTCATFTC      |
|           | NM_172349       | 5-AGAAGAAATGTCTGCTGCC      | 5-GGATCATCCGAAAGGGCTGT      |
| U2AF1*    | NM_001025203    | 5-TTGGAGCATGTGTCATGGAG     | 5-CTGTGACTGTTTTGGGGATT      |
|           | NM_006758       | 5-TGCCCTCTTGAACATTTACCGT   | 5-CTGCATCTCCACATCGCTCA      |
| PDGFB     | NM_002608       | 5-CTCGCGCTTTCGGATTTTG      | 5-AGAGGAAAAGGAACACGGCA      |
|           | NM_033016       | 5-GACTGAGCAGGAATGGTGAGAT   | 5-TCAAAGGAGCGGATCGAGTG      |
| DNMT3A*   | NM_153759       | 5-GCAGCTACTTCCAGAGCTTCA    | 5-TTTCAGGTACGATCCACGC       |
|           | NM_175630       | 5-GGGCAGCAGATACCTGTTT      | 5-GGCTGGGCAGTACACAGAA       |
| GNAS*     | NM_016592       | 5-CGAGTCTTAGGCTGCGGAAT     | 5-GCACCTACCTTCTGACCAC       |
|           | NM_080425       | 5-CACTCCCGTCAACATGGACA     | 5-GTACCCCGGAGAGGGTACTT      |
| RBM15     | NM_001201545    | 5-ATGCCTTCCCACCTTGTGAG     | 5-TCAACCAGTTTTGCACGGAC      |
|           | NM_022768       | 5-AACAAGAAGAGAGAAAACCTGGCG | 5-TTTCCTCCCTTAGGGACACC      |
| RET       | NM_020630       | 5-TGCCCAGCAACTTAGGATGG     | 5-TTGATTCCCACCCAGAAAGC      |
|           | NM_020975       | 5-AATGGAAAAGTCTACCCGGCC    | 5-CAGAGCTCTTACCCGGTGTG      |
| TCF3      | NM_001136139    | 5-GAGAAAGACCTGAGGGACCG     | 5-GGCCTCGTTAATATCCCGCA      |
|           | NM_003200       | 5-CAACTGCACCTCAACAGCGA     | 5-CTCCAAGTTCAGGATGACCGA     |
| WHSC1L1   | NM_017778       | 5-GCCTCTCAGTACAGCACTCC     | 5-GCCTGCCCATGTTAATGCTG      |
|           | NM_023034       | 5-AGAAAGGTGCCAGCGAGATT     | 5-GCAGGTCACTCAGTCCTCTA      |
| CBFB      | NM_001755       | 5-GGATGCATTAGCACAACAGGC    | 5-GCCAGCAGCTGTGAAACTCT      |
|           | NM_022845       | 5-CGGGAGGAAATGGAGGCAAG     | 5-GTAAAGATGGGCAGCACACAT     |
| TP53      | Iso Group1      | 5-GATGAAGCTCCCAGAATGCC     | 5-GTAGCTGCCCTGGTAGGTTT      |
|           | Iso Group2      | 5-GAGGTGTAGACGCCAACTCT     | 5-AAGTCAGGGCACAAGTGAACA     |
| NF1*      | NM_000267       | 5-TGAGGAAAACAGCGGAACC      | 5-GCTGGCTAACCCACCTGGTATAAA  |
|           | NM_001128147    | 5-GTGGAATCCTGTGCTCCTGT     | 5-AAAACCATAAAACCTTTGGAAGTGT |

**S3 Table. Primer sets of the transcripts in thirteen genes of MCF7 cancer cell line. \*** Gene contains more transcript(s) which can not be quantified by qRT-PCR.
