# Supplementary material for: Network-Based Isoform Quantification with RNA-Seq Data for Cancer Transcriptome Analysis
Source: PubMed Central journal article supplement (PMC4689380; doi:10.1371/journal.pcbi.1004465), 2015-12-23
Supplement: pcbi.1004465.s011.pdf [file pcbi.1004465.s011.pdf]

| KEGG Pathway                                               | # of gene in KEGG | # of overlapped gene | Interactions | Density |
|------------------------------------------------------------|-------------------|----------------------|--------------|---------|
| Long-term potentiation                                     | 67                | 30                   | 552          | 61.33%  |
| Fc epsilon RI signaling pathway                            | 70                | 51                   | 1426         | 54.83%  |
| Fc gamma R-mediated phagocytosis                           | 91                | 45                   | 1002         | 49.48%  |
| Axon guidance                                              | 127               | 56                   | 1526         | 48.66%  |
| VEGF signaling pathway                                     | 61                | 39                   | 736          | 48.39%  |
| GnRH signaling pathway                                     | 92                | 53                   | 1356         | 48.27%  |
| Phosphatidylinositol signaling system                      | 82                | 26                   | 318          | 47.04%  |
| ErbB signaling pathway                                     | 87                | 70                   | 2272         | 46.37%  |
| Inositol phosphate metabolism                              | 63                | 14                   | 86           | 43.88%  |
| Neuroactive ligand-receptor interaction                    | 275               | 38                   | 626          | 43.35%  |
| Glycerophospholipid metabolism                             | 95                | 12                   | 62           | 43.06%  |
| Olfactory transduction                                     | 407               | 15                   | 92           | 40.89%  |
| Neurotrophin signaling pathway                             | 120               | 88                   | 3128         | 40.39%  |
| Central carbon metabolism in cancer                        | 67                | 38                   | 580          | 40.17%  |
| Natural killer cell mediated cytotoxicity                  | 134               | 47                   | 848          | 38.39%  |
| Glutamatergic synapse                                      | 116               | 21                   | 168          | 38.10%  |
| Retrograde endocannabinoid signaling                       | 103               | 25                   | 238          | 38.08%  |
| RNA polymerase                                             | 32                | 11                   | 46           | 38.02%  |
| Glioma                                                     | 65                | 46                   | 800          | 37.81%  |
| Ras signaling pathway                                      | 228               | 119                  | 5182         | 36.59%  |
| Inflammatory mediator regulation of TRP channels           | 99                | 45                   | 722          | 35.65%  |
| Long-term depression                                       | 60                | 25                   | 220          | 35.20%  |
| Gap junction                                               | 89                | 42                   | 620          | 35.15%  |
| B cell receptor signaling pathway                          | 72                | 45                   | 706          | 34.86%  |
| Tight junction                                             | 138               | 49                   | 830          | 34.57%  |
| Glycerolipid metabolism                                    | 59                | 13                   | 58           | 34.32%  |
| mTOR signaling pathway                                     | 60                | 35                   | 418          | 34.12%  |
| T cell receptor signaling pathway                          | 104               | 80                   | 2178         | 34.03%  |
| Vascular smooth muscle contraction                         | 121               | 43                   | 622          | 33.64%  |
| Non-small cell lung cancer                                 | 56                | 45                   | 662          | 32.69%  |
| Chemokine signaling pathway                                | 189               | 86                   | 2408         | 32.56%  |
| Cell adhesion molecules (CAMs)                             | 142               | 32                   | 332          | 32.42%  |
| Choline metabolism in cancer                               | 101               | 56                   | 1012         | 32.27%  |
| MAPK signaling pathway                                     | 257               | 156                  | 7830         | 32.17%  |
| Epithelial cell signaling in Helicobacter pylori infection | 68                | 36                   | 414          | 31.94%  |
| Oxytocin signaling pathway                                 | 159               | 63                   | 1264         | 31.85%  |
| Type II diabetes mellitus                                  | 48                | 23                   | 166          | 31.38%  |
| Adherens junction                                          | 73                | 48                   | 722          | 31.34%  |
| Lysine degradation                                         | 52                | 11                   | 36           | 29.75%  |
| Circadian entrainment                                      | 97                | 28                   | 232          | 29.59%  |
| Prolactin signaling pathway                                | 72                | 52                   | 792          | 29.29%  |
| Insulin signaling pathway                                  | 140               | 75                   | 1634         | 29.05%  |
| Cholinergic synapse                                        | 113               | 42                   | 512          | 29.02%  |
| Morphine addiction                                         | 93                | 21                   | 126          | 28.57%  |
| Bladder cancer                                             | 38                | 34                   | 322          | 27.85%  |
| Platelet activation                                        | 131               | 57                   | 892          | 27.45%  |
| Progesterone-mediated oocyte maturation                    | 88                | 63                   | 1074         | 27.06%  |
| Toll-like receptor signaling pathway                       | 106               | 56                   | 842          | 26.85%  |
| Rap1 signaling pathway                                     | 211               | 119                  | 3722         | 26.28%  |
| Leukocyte transendothelial migration                       | 118               | 51                   | 680          | 26.14%  |
| Pancreatic cancer                                          | 66                | 58                   | 870          | 25.86%  |
| Complement and coagulation cascades                        | 69                | 23                   | 136          | 25.71%  |
| Acute myeloid leukemia                                     | 57                | 48                   | 586          | 25.43%  |
| Renal cell carcinoma                                       | 66                | 55                   | 754          | 24.93%  |
| Endometrial cancer                                         | 52                | 41                   | 414          | 24.63%  |
| Sphingolipid signaling pathway                             | 120               | 66                   | 1068         | 24.52%  |
| Focal adhesion                                             | 207               | 103                  | 2600         | 24.51%  |
| Regulation of actin cytoskeleton                           | 215               | 95                   | 2210         | 24.49%  |
| FoxO signaling pathway                                     | 134               | 94                   | 2102         | 23.79%  |
| Amyotrophic lateral sclerosis (ALS)                        | 51                | 20                   | 94           | 23.50%  |
| Osteoclast differentiation                                 | 131               | 82                   | 1544         | 22.96%  |
| Melanoma                                                   | 71                | 50                   | 566          | 22.64%  |
| Serotonergic synapse                                       | 114               | 29                   | 190          | 22.59%  |
| Gastric acid secretion                                     | 75                | 24                   | 130          | 22.57%  |
| Hepatitis C                                                | 133               | 73                   | 1194         | 22.41%  |
| Dopaminergic synapse                                       | 131               | 44                   | 426          | 22.00%  |
| Calcium signaling pathway                                  | 180               | 51                   | 570          | 21.91%  |
| Pathogenic Escherichia coli infection                      | 55                | 22                   | 104          | 21.49%  |
| Influenza A                                                | 175               | 76                   | 1172         | 20.29%  |
| Estrogen signaling pathway                                 | 100               | 51                   | 524          | 20.15%  |
| Chronic myeloid leukemia                                   | 73                | 63                   | 796          | 20.06%  |
| Aldosterone-regulated sodium reabsorption                  | 39                | 22                   | 96           | 19.83%  |
| Ovarian steroidogenesis                                    | 51                | 18                   | 64           | 19.75%  |
| NOD-like receptor signaling pathway                        | 57                | 31                   | 186          | 19.35%  |
| cAMP signaling pathway                                     | 200               | 82                   | 1298         | 19.30%  |
| Colorectal cancer                                          | 62                | 52                   | 498          | 18.42%  |
| Proteoglycans in cancer                                    | 204               | 130                  | 3082         | 18.24%  |
| Prostate cancer                                            | 89                | 70                   | 884          | 18.04%  |
| RIG-I-like receptor signaling pathway                      | 70                | 35                   | 220          | 17.96%  |
| Signaling pathways regulating pluripotency of stem cells   | 142               | 84                   | 1250         | 17.72%  |
| cGMP-PKG signaling pathway                                 | 167               | 56                   | 542          | 17.28%  |
| Thyroid hormone signaling pathway                          | 119               | 62                   | 662          | 17.22%  |
| TGF-beta signaling pathway                                 | 80                | 51                   | 446          | 17.15%  |
| Endocytosis                                                | 213               | 84                   | 1204         | 17.06%  |
| ECM-receptor interaction                                   | 87                | 23                   | 90           | 17.01%  |
| Adipocytokine signaling pathway                            | 70                | 38                   | 242          | 16.76%  |
| Hepatitis B                                                | 146               | 98                   | 1510         | 15.72%  |
| Jak-STAT signaling pathway                                 | 156               | 69                   | 734          | 15.42%  |
| HIF-1 signaling pathway                                    | 103               | 68                   | 710          | 15.35%  |
| Glucagon signaling pathway                                 | 102               | 33                   | 166          | 15.24%  |
| Ubiquitin mediated proteolysis                             | 137               | 66                   | 654          | 15.01%  |
| TNF signaling pathway                                      | 110               | 79                   | 894          | 14.32%  |
| PI3K-Akt signaling pathway                                 | 347               | 166                  | 3904         | 14.17%  |
| AMPK signaling pathway                                     | 124               | 59                   | 476          | 13.67%  |
| Wnt signaling pathway                                      | 140               | 76                   | 774          | 13.40%  |
| Adrenergic signaling in cardiomyocytes                     | 149               | 62                   | 496          | 12.90%  |
| NF-kappa B signaling pathway                               | 91                | 55                   | 380          | 12.56%  |
| MicroRNAs in cancer                                        | 297               | 109                  | 1484         | 12.49%  |
| Cell cycle                                                 | 124               | 91                   | 734          | 8.86%   |
| Pathways in cancer                                         | 398               | 260                  | 5702         | 8.43%   |

**S4 Table. Overlapped KEGG pathways with large transcript network.** We consider the subnetwork of genes that are members of one KEGG pathway and calculated the density of DDIs in the subnetwork.
