# Supplementary material for: Network-Based Isoform Quantification with RNA-Seq Data for Cancer Transcriptome Analysis
Source: PubMed Central journal article supplement (PMC4689380; doi:10.1371/journal.pcbi.1004465), 2015-12-23
Supplement: pcbi.1004465.s012.pdf [file pcbi.1004465.s012.pdf]

| Gene Name | Transcript Name     | Estimated Proportion |         |           |        | qRT-PCR Results |
|-----------|---------------------|----------------------|---------|-----------|--------|-----------------|
|           |                     | Net-RSTQ             | base EM | Cufflinks | RSEM   |                 |
| ABL1      | NM_007313           | 64.46%               | 94.45%  | 16.48%    | 53.14% | 56±4.4%         |
|           | NM_005157           | 35.54%               | 5.55%   | 83.52%    | 46.86% | 44±4.4%         |
| CBLC      | NM_012116           | 73.12%               | 93.23%  | 87.59%    | 87.54% | 51±9.8%         |
|           | NM_001130852        | 26.88%               | 6.77%   | 12.41%    | 12.46% | 49±9.8%         |
| KDM5C     | NM_004187           | 80.52%               | 99.22%  | 99.95%    | 91.52% | 86±4.5%         |
|           | NM_001146702        | 19.48%               | 0.78%   | 0.05%     | 8.48%  | 14±4.5%         |
| KRAS      | NM_033360           | 51.36%               | 80.23%  | 58.82%    | 19.67% | 36±4.2%         |
|           | NM_004985           | 48.64%               | 19.77%  | 41.18%    | 80.33% | 64±4.2%         |
| NPM1      | NM_002520 (Iso1)    | 34.92%               | 55.84%  | 0%        | 84.62% | 52%*            |
|           | NM_199185 (Iso2)    | 29.09%               | 6.56%   | 53.97%    | 1.52%  | 45%             |
|           | NM_001037738 (Iso3) | 35.99%               | 37.60%  | 46.03%    | 13.86% | 3.2%            |
| TCF3      | NM_003200           | 78.31%               | 98.11%  | 96.42%    | 90.06% | 56±6.5%         |
|           | NM_001136139        | 21.69%               | 1.89%   | 3.58%     | 9.94%  | 44±6.5%         |
| WHSC1L1   | NM_023034           | 39.98%               | 73.61%  | 4.50%     | 37.72% | 46±6.1%         |
|           | NM_017778           | 60.02%               | 26.39%  | 95.50%    | 62.28% | 54±6.1%         |

**S5 Table. qRT-PCR results on H9 stem cell line.** \* Standard deviation of Iso1+Iso3 is 5.7% and Iso3 is 4.4%
