# Supplementary material for: Network-Based Isoform Quantification with RNA-Seq Data for Cancer Transcriptome Analysis
Source: PubMed Central journal article supplement (PMC4689380; doi:10.1371/journal.pcbi.1004465), 2015-12-23
Supplement: pcbi.1004465.s013.pdf [file pcbi.1004465.s013.pdf]

| Gene Name | Transcript Name | Estimated Proportion |         |           |        | qRT-PCR Results |
|-----------|-----------------|----------------------|---------|-----------|--------|-----------------|
|           |                 | Net-RSTQ             | base EM | Cufflinks | RSEM   |                 |
| HNRNPA2B1 | NM_031243       | 60.07%               | 81.42%  | 0%        | 42.37% | 82.83%          |
|           | NM_002137       | 39.93%               | 18.58%  | 100%      | 57.63% | 17.17%          |
| HRAS*     | NM_176795       | 54.92%               | 100%    | 11.62%    | 11.72% | 50.16%          |
|           | NM_005343       | 45.08%               | 0%      | 88.38%    | 88.28% | 49.84%          |
| NSD1      | NM_022455       | 55.40%               | 96.39%  | 99.94%    | 61.65% | 99.98%          |
|           | NM_172349       | 44.60%               | 3.61%   | 0.06%     | 38.35% | 0.02%           |
| TSC2*     | NM_000548       | 52.39%               | 92.36%  | 0.01%     | 4.62%  | 45.36%          |
|           | NM_001077183    | 47.61%               | 7.64%   | 99.99%    | 95.38% | 54.64%          |
| WHSC1L1   | NM_023034       | 48.84%               | 63.85%  | 0.01%     | 35.69% | 18.81%          |
|           | NM_017778       | 51.16%               | 36.15%  | 99.99%    | 64.31% | 81.19%          |

**S6 Table. qRT-PCR results on OVCAR8 cancer cell line.** \* Gene contains more transcript which can not be quantified by qRT-PCR.
