# Supplementary material for: Network-Based Isoform Quantification with RNA-Seq Data for Cancer Transcriptome Analysis
Source: PubMed Central journal article supplement (PMC4689380; doi:10.1371/journal.pcbi.1004465), 2015-12-23
Supplement: pcbi.1004465.s014.pdf [file pcbi.1004465.s014.pdf]

| Gene Name | Transcript Name | Estimated Proportion |         |           |        | qRT-PCR Results |
|-----------|-----------------|----------------------|---------|-----------|--------|-----------------|
|           |                 | Net-RSTQ             | base EM | Cufflinks | RSEM   |                 |
| ERBB2     | NM_001005862    | 26.16%               | 7.79%   | 3.35%     | 6.34%  | 7.35±0.75%      |
|           | NM_004448       | 73.84%               | 92.21%  | 96.65%    | 93.66% | 92.65±6.0%      |
| NSD1      | NM_022455       | 46.77%               | 20.08%  | 21.94%    | 17.14% | 58.34±0.70%     |
|           | NM_172349       | 53.23%               | 79.92%  | 78.06%    | 82.86% | 41.66±0.75%     |
| U2AF1*    | NM_001025203    | 26.68%               | 21.11%  | 73.15%    | 25.33% | 39.13±0.50%     |
|           | NM_006758       | 73.32%               | 78.89%  | 26.85%    | 74.67% | 60.87±2.5%      |
| PDGFB     | NM_002608       | 21.51%               | 18.03%  | 43.93%    | 18.12% | 97.69±6.5%      |
|           | NM_033016       | 78.49%               | 81.97%  | 56.07%    | 81.88% | 2.31±1.4%       |
| DNMT3A*   | NM_153759       | 99.53%               | 99.77%  | 99.45%    | 99.46% | 11.06±3.0%      |
|           | NM_175630       | 0.47%                | 0.23%   | 0.55%     | 0.54%  | 88.94±4.0%      |
| GNAS*     | NM_016592       | 69.65%               | 87.11%  | 93.62%    | 89.66% | 98.27±5.0%      |
|           | NM_080425       | 30.35%               | 12.89%  | 6.38%     | 10.34% | 1.73±0%         |
| RBM15     | NM_001201545    | 51.65%               | 77.37%  | 63.21%    | 73.85% | 30.21±0.55%     |
|           | NM_022768       | 48.35%               | 22.63%  | 36.79%    | 26.15% | 69.79±1.8%      |
| RET       | NM_020630       | 57.13%               | 60.36%  | 70.78%    | 67.76% | 37.04±1.3%      |
|           | NM_020975       | 42.87%               | 39.64%  | 29.22%    | 32.24% | 62.96±2.3%      |
| TCF3      | NM_001136139    | 35.90%               | 31.51%  | 6.70%     | 36.31% | 26.85±1.1%      |
|           | NM_003200       | 64.10%               | 68.49%  | 93.30%    | 63.69% | 73.15±4.0%      |
| WHSC1L1   | NM_017778       | 59.60%               | 54.38%  | 77.61%    | 62.43% | 77.36±2.0%      |
|           | NM_023034       | 40.40%               | 45.62%  | 22.39%    | 37.57% | 22.64±0.18%     |
| CBFB      | NM_001755       | 51.89%               | 52.80%  | 13.84%    | 57.67% | 63.75±1.1%      |
|           | NM_022845       | 48.11%               | 47.20%  | 86.16%    | 42.33% | 36.25±1.2%      |
| TP53      | Iso Group1      | 96.90%               | 99.37%  | 99.10%    | 97.41% | 98.12±6.0%      |
|           | Iso Group2      | 3.10%                | 0.63%   | 0.90%     | 2.59%  | 1.88±0.30%      |
| NF1*      | NM_000267       | 98.08%               | 98.56%  | 15.14%    | 94.55% | 85.76±2.5%      |
|           | NM_001128147    | 1.92%                | 1.44%   | 84.86%    | 5.45%  | 14.24±2.0%      |

**S7 Table. qRT-PCR results on MCF7 cancer cell line.** \* Gene contains more transcript(s) which can not be quantified by qRT-PCR.
