# Supplementary material for: Network-Based Isoform Quantification with RNA-Seq Data for Cancer Transcriptome Analysis
Source: PubMed Central journal article supplement (PMC4689380; doi:10.1371/journal.pcbi.1004465), 2015-12-23
Supplement: pcbi.1004465.s015.pdf [file pcbi.1004465.s015.pdf]

|          | Regularized framework |               |               |               |               |
|----------|-----------------------|---------------|---------------|---------------|---------------|
|          | $\lambda$             | <b>0.1</b>    | <b>1</b>      | <b>10</b>     | <b>100</b>    |
| Net-RSTQ | <b>1e-04</b>          | 0.9689        | 0.9536        | 0.9442        | 0.8668        |
|          | <b>1e-03</b>          | 0.9696        | 0.9549        | 0.9453        | 0.8680        |
|          | <b>5e-03</b>          | 0.9722        | 0.9583        | 0.9488        | 0.8715        |
|          | <b>0.01</b>           | 0.9751        | 0.9620        | 0.9526        | 0.8751        |
|          | <b>0.05</b>           | 0.9887        | 0.9804        | 0.9720        | 0.8939        |
|          | <b>0.1</b>            | 0.9943        | 0.9895        | 0.9819        | 0.9038        |
|          | <b>0.2</b>            | <b>0.9959</b> | 0.9947        | 0.9882        | 0.9111        |
|          | <b>0.3</b>            | 0.9950        | <b>0.9954</b> | 0.9899        | 0.9141        |
|          | <b>0.4</b>            | 0.9938        | 0.9951        | 0.9905        | 0.9164        |
|          | <b>0.5</b>            | 0.9925        | 0.9945        | 0.9909        | 0.9188        |
|          | <b>0.6</b>            | 0.9910        | 0.9935        | 0.9912        | 0.9218        |
|          | <b>0.7</b>            | 0.9889        | 0.9920        | <b>0.9914</b> | 0.9258        |
|          | <b>0.8</b>            | 0.9854        | 0.9891        | 0.9911        | 0.9319        |
|          | <b>0.9</b>            | 0.9770        | 0.9815        | 0.9883        | 0.9424        |
|          | <b>0.99</b>           | 0.9328        | 0.9387        | 0.9543        | <b>0.9601</b> |
|          | <b>0.999</b>          | 0.9121        | 0.9181        | 0.9349        | 0.9578        |

**S8 Table. Correlation Coefficients between the results of Net-RSTQ and the alternative regularized framework with different  $\lambda$ s.** The highest correlation coefficients for each  $\lambda$  in the alternative regularized framework is bold.
