# Supplementary material for: Network-Based Isoform Quantification with RNA-Seq Data for Cancer Transcriptome Analysis
Source: PLOS journal article supplement (doi:10.1371/journal.pcbi.1004465), 2015-12-23
Supplement: S2 (10.1371/journal.pcbi.1004465.s002) [file journal.pcbi.1004465.s002]

## Steps of generating the simulation data

Below are the steps of generating the simulation data,

1. Generate 397 gene expression  $E$  by sampling a poisson distribution.
2. For the genes with multiple transcripts, generate isoform expressions from a mixed power law by the flux-simulator to calculate the initial proportion  $p_{ik}(0)$  for each transcript  $T_{ik}$ .
3. Let the initial isoform expression  $\pi_{ik}(0) = E_i * p_{ik}(0) + \text{gaussian noise}$
4. Let  $\alpha = 1$ ; Repeat  $p_{ik} = (\alpha * \sum_{j \in nb(T_{ik})} \frac{\pi_{g(j),j}}{|nb(T_{ik})|} + \pi_{ik}(0)) / \sum_q (\alpha * \sum_{j \in nb(T_{iq})} \frac{\pi_{g(j),j}}{|nb(T_{iq})|} + \pi_{iq}(0))$ .
5. After convergence,  $\pi_{ik} = E_i * p_{ik}$ .
6.  $\pi$  is further normalized and used with flux-simulator as the ground truth expressions.
